# Supplementary material for: Macrophage-derived EDA-A2 inhibits intestinal stem cells by targeting miR-494/EDA2R/β-catenin signaling in mice
Source: PubMed Central journal article supplement (PMC7887198; doi:10.1038/s42003-021-01730-0), 2021-02-16
Supplement: 42003_2021_1730_MOESM2_ESM.pdf [file 42003_2021_1730_MOESM2_ESM.pdf]

## **Description of Additional Supplementary Files**

File Name: Supplementary Data 1

Description: The source data underlying the graphs and charts presented in the main figures.
